# Supplementary material
Source: Research Square preprint supplement (doi:10.21203/rs.3.rs-10347445/v1)
Supplement: Supplementary file 1 [file 48ff059b1a37ff462c70d32b.docx]

**Highlights:**

1. PG-modification raised the oil-binding capacity of starch oleogel to 98%.
2. Moderate deamidation promotes amylopectin-protein hydrogen bond network formation.
3. The optimized oleogel can fully replace butter in piped cookies.
